# Supplementary material for: Controlled synthesis of methacrylate and acrylate diblock copolymers via end-capping using CCTP and FRP
Source: Royal Society of Chemistry journal article supplement (doi:10.1039/c9py01133a), 2019-01-01
Supplement: c9py01133a1.pdf [file c9py01133a1.pdf]

## **SUPPLEMENTARY INFO**

### **Controlled Synthesis of Methacrylate and Acrylate Diblock Copolymers via End-Capping using CCTP and FRP**

Georgios Patias,<sup>a</sup> Alan M. Wemyss,<sup>a</sup> Spyridon Efstathiou,<sup>a</sup> James S. Town,<sup>a</sup> Christophe J. Atkins,<sup>a</sup>  
Ataulla Shegiwal,<sup>a</sup> Richard Whitfield,<sup>a</sup> David M. Haddleton<sup>\*a</sup>

<sup>a</sup>University of Warwick, Department of Chemistry, Gibbet Hill, CV4 7AL, Coventry, United Kingdom

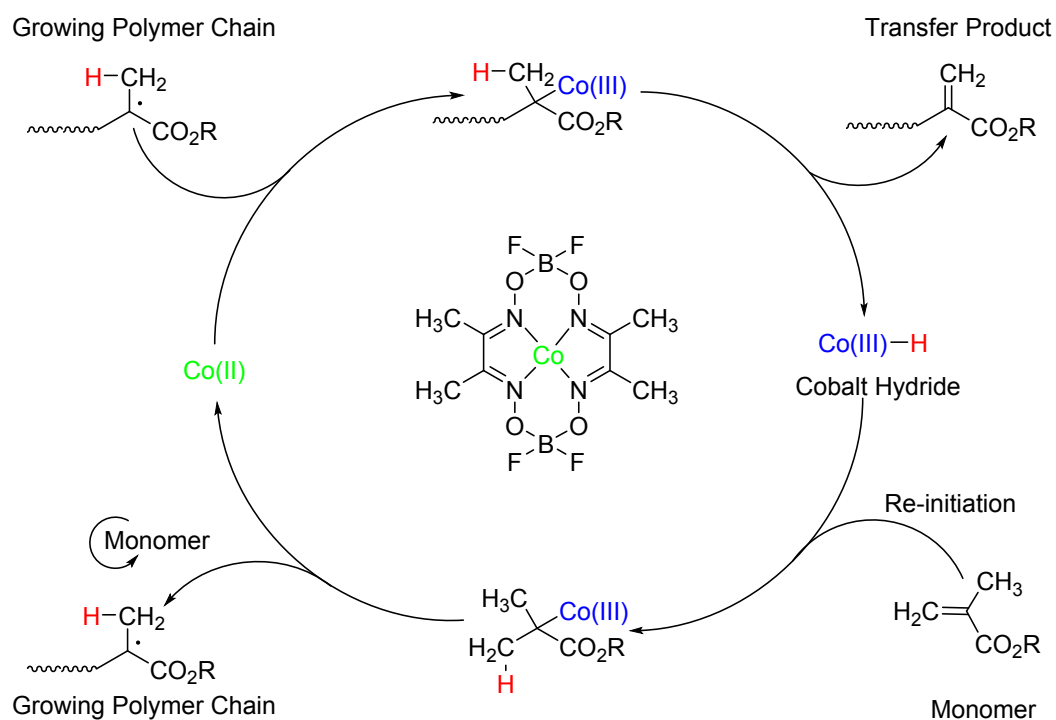

Supplementary Figure 1: Main catalytic cycle for bis(boron difluorodimethylglyoximate) cobalt(II) (CoBF) mediated catalytic chain transfer polymerisation.

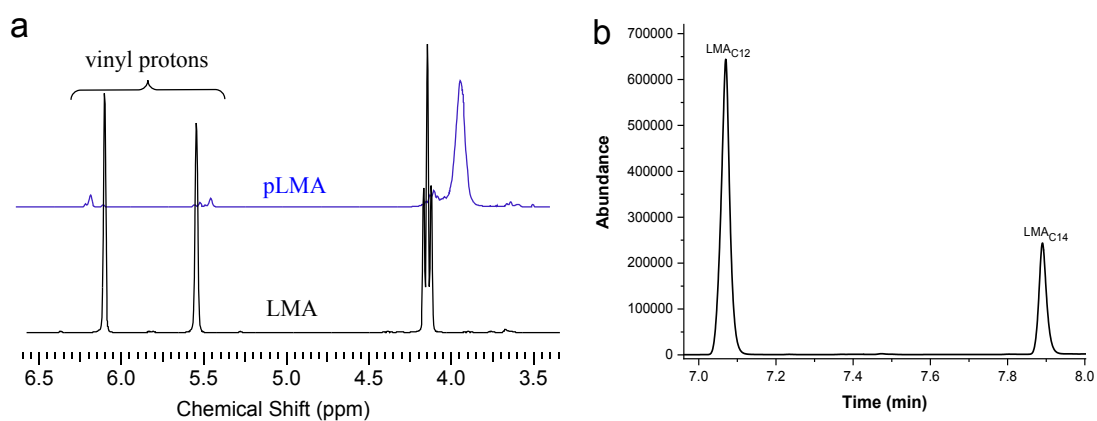

Supplementary Figure 2: a)  $^1\text{H}$  NMR of PLMA macromonomer and LMA monomer. Monomer conversion of polymer = 95% based on integrals. b) Gas chromatography of LMA monomer, the ratio of  $\text{LMA}_{\text{C12}}$  to  $\text{LMA}_{\text{C14}}$  was 77:23 based on integrals.

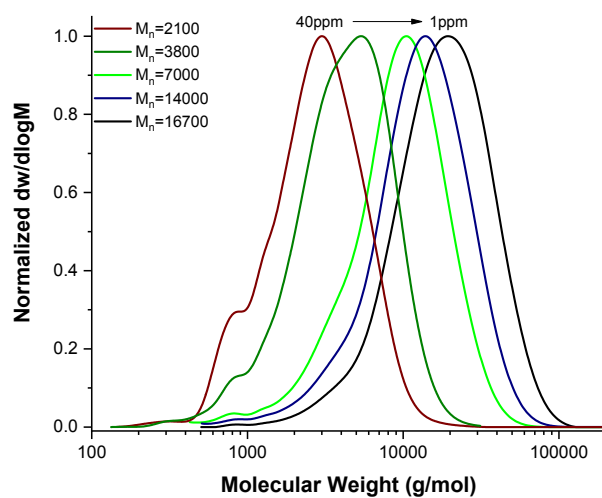

Supplementary Figure 3: GPC results of pLMA macromonomers made via CCTP. Concentration of Co(MePh)BF was 1-40ppm (relative to monomer). Polydispersity index of products: 1.53-1.65.

Supplementary Table 1: Data used for the calculation of the chain transfer activity of Co(MePh)BF in CCTP polymerisation of LMA in toluene.

| [Co] (ppm) | $M_{n, GPC}$ | $\bar{D}$ | Conv. NMR, % |
|------------|--------------|-----------|--------------|
| 1          | 16700        | 1.64      | 98           |
| 2          | 14000        | 1.53      | 98           |
| 10         | 7000         | 1.65      | 95           |
| 20         | 3800         | 1.64      | 96           |
| 40         | 2100         | 1.62      | 97           |

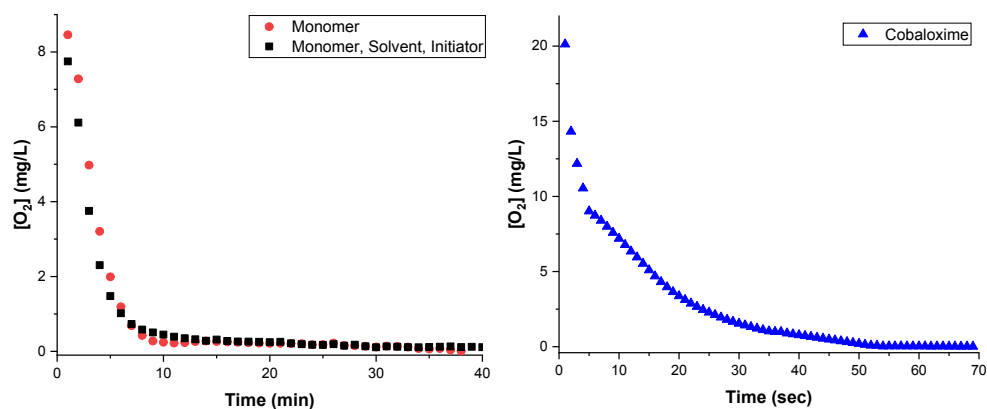

Supplementary Figure 4: Graphical illustration of the decrease in oxygen concentration during degassing for a) the dissolved oxygen in the monomer or a solution of the monomer, solvent and initiator and b) the oxygen present in the round bottom flask containing the cobaloxime catalyst.

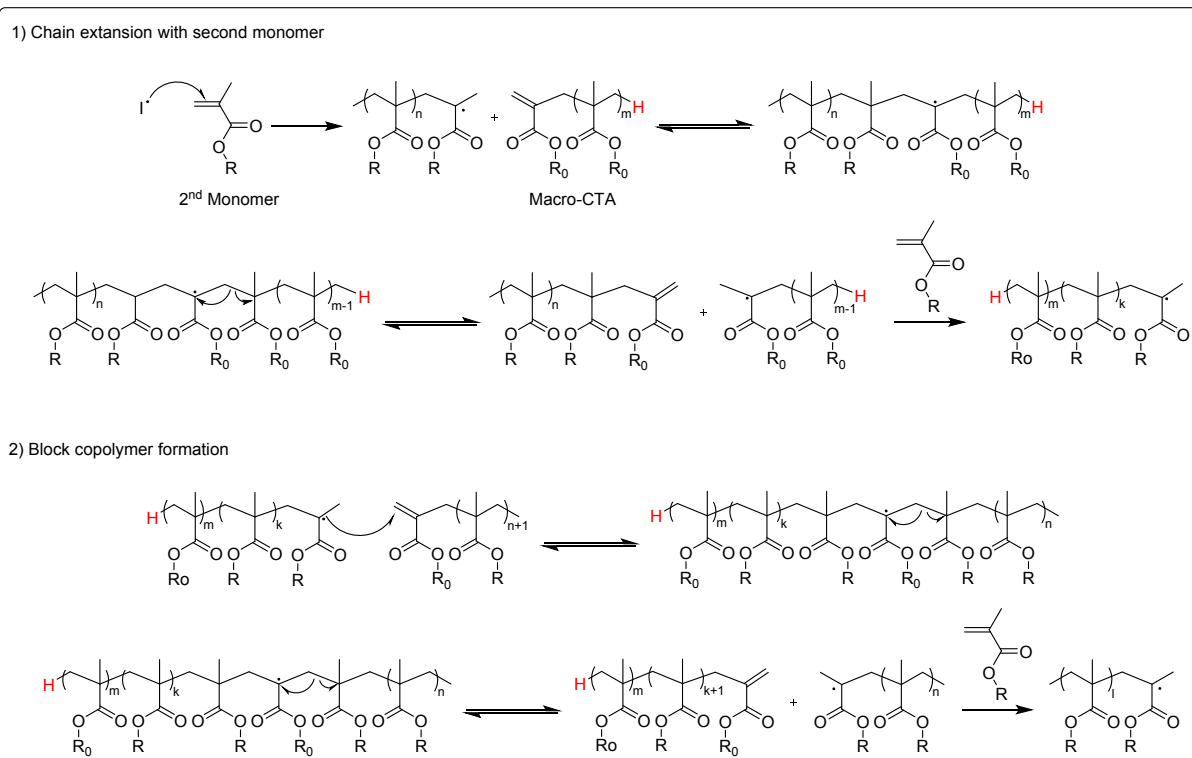

Supplementary Figure 5: Proposed mechanism of SF-RAFT of methacrylates.

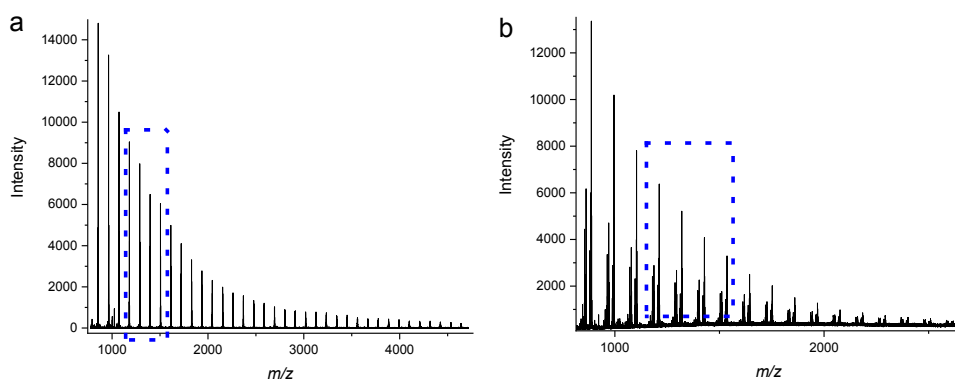

Supplementary Figure 6: a) Full MALDI-ToF spectra of the copolymerisation of pMMA<sub>4</sub> with MMA<sub>8</sub>. b) Full MALDI-ToF spectra of the copolymerisation of pMMA<sub>4</sub> with MMA<sub>8</sub>, in the presence of CoBF.

Supplementary Table 2: Characterisation of the ionised peaks of Figures 2a and 2b.

| Figure 2a           |                         |                                                                                      |
|---------------------|-------------------------|--------------------------------------------------------------------------------------|
| Peak ( <i>m/z</i> ) | DP of pMMA <sub>8</sub> | Product                                                                              |
| 1179.962            | 7                       | MMA <sub>3</sub> (MMA <sub>8</sub> ) <sub>7</sub> MMA <sub>1</sub> + Na <sup>+</sup> |
| 1288.117            | 8                       | MMA <sub>3</sub> (MMA <sub>8</sub> ) <sub>8</sub> MMA <sub>1</sub> + Na <sup>+</sup> |
| 1396.263            | 9                       | MMA <sub>3</sub> (MMA <sub>8</sub> ) <sub>9</sub> MMA <sub>1</sub> + Na <sup>+</sup> |
| Figure 2b           |                         |                                                                                      |
| Peak ( <i>m/z</i> ) | DP of pMMA <sub>8</sub> | Product                                                                              |
| 1179.593            | 7                       | MMA <sub>3</sub> (MMA <sub>8</sub> ) <sub>7</sub> MMA <sub>1</sub> + Na <sup>+</sup> |
| 1186.635            | 7                       | MMA <sub>3</sub> (MMA <sub>8</sub> ) <sub>7</sub> + Na <sup>+</sup>                  |
| 1204.70             | 7                       | (MMA <sub>8</sub> ) <sub>7</sub> MMA <sub>1</sub> + Na <sup>+</sup>                  |
| 1211.785            | 7                       | D-(MMA <sub>8</sub> ) <sub>7</sub> + Na <sup>+</sup>                                 |
| 1287.665            | 8                       | MMA <sub>3</sub> (MMA <sub>8</sub> ) <sub>8</sub> MMA <sub>1</sub> + Na <sup>+</sup> |
| 1294.707            | 8                       | MMA <sub>3</sub> (MMA <sub>8</sub> ) <sub>8</sub> + Na <sup>+</sup>                  |
| 1312.813            | 8                       | (MMA <sub>8</sub> ) <sub>8</sub> MMA <sub>1</sub> + Na <sup>+</sup>                  |
| 1319.857            | 8                       | D-(MMA <sub>8</sub> ) <sub>8</sub> + Na <sup>+</sup>                                 |

Supplementary Table 3: Results of MALDI-ToF MS of the polymerisation of MA in the presence of 4.3 mol% MMA<sub>2</sub> (sample 4) and 4.3 mol% MMA<sub>4</sub> (sample 9).

| Peak ( <i>m/z</i> ) | DP of pMA | Product                                                    |
|---------------------|-----------|------------------------------------------------------------|
| Sample 4            |           |                                                            |
| 2459.226            | 22        | pMA-(MMA <sub>2</sub> ) <sub>2</sub> + I + Na <sup>+</sup> |
| 2487.265            | 20        | pMA-(MMA <sub>2</sub> ) <sub>3</sub> + I + Na <sup>+</sup> |
| 2516.265            | 18        | pMA-(MMA <sub>2</sub> ) <sub>4</sub> + I + Na <sup>+</sup> |
| 2545.265            | 23        | pMA-(MMA <sub>2</sub> ) <sub>2</sub> + I + Na <sup>+</sup> |
| 2573.296            | 21        | pMA-(MMA <sub>2</sub> ) <sub>3</sub> + I + Na <sup>+</sup> |
| 2603.299            | 19        | pMA-(MMA <sub>2</sub> ) <sub>4</sub> + I + Na <sup>+</sup> |
| Sample 9            |           |                                                            |
| 3061.101            | 29        | pMA-(MMA <sub>4</sub> ) <sub>1</sub> + I + Na <sup>+</sup> |
| 3090.987            | 34        | pMA + I + Na <sup>+</sup>                                  |
| 3118.160            | 25        | pMA-(MMA <sub>4</sub> ) <sub>2</sub> + I + Na <sup>+</sup> |
| 3147.244            | 30        | pMA-(MMA <sub>4</sub> ) <sub>1</sub> + I + Na <sup>+</sup> |
| 3176.068            | 35        | pMA + I + Na <sup>+</sup>                                  |
| 3203.242            | 26        | pMA-(MMA <sub>4</sub> ) <sub>2</sub> + I + Na <sup>+</sup> |

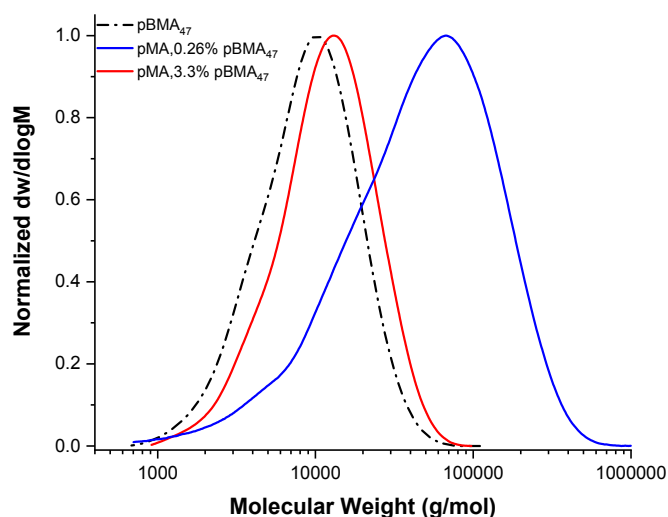

Supplementary Figure 7: GPC results of the free radical polymerisation of pMA in the presence of 0.26 and 3.3 mol% pBMA.

Supplementary Table 4: GPC data of the free radical polymerisation of MA in the presence of pBMA.

| Reagents                            | Macromonomer to Monomer mol% | $M_{n, GPC}$ | $\bar{D}$ |
|-------------------------------------|------------------------------|--------------|-----------|
| PBMA <sub>47</sub>                  | -                            | 6700         | 1.74      |
| PBMA <sub>47</sub> PMA <sub>x</sub> | 0.26                         | 8700         | 1.68      |
| PBMA <sub>47</sub> PMA <sub>y</sub> | 3.3                          | 20200        | 3.82      |

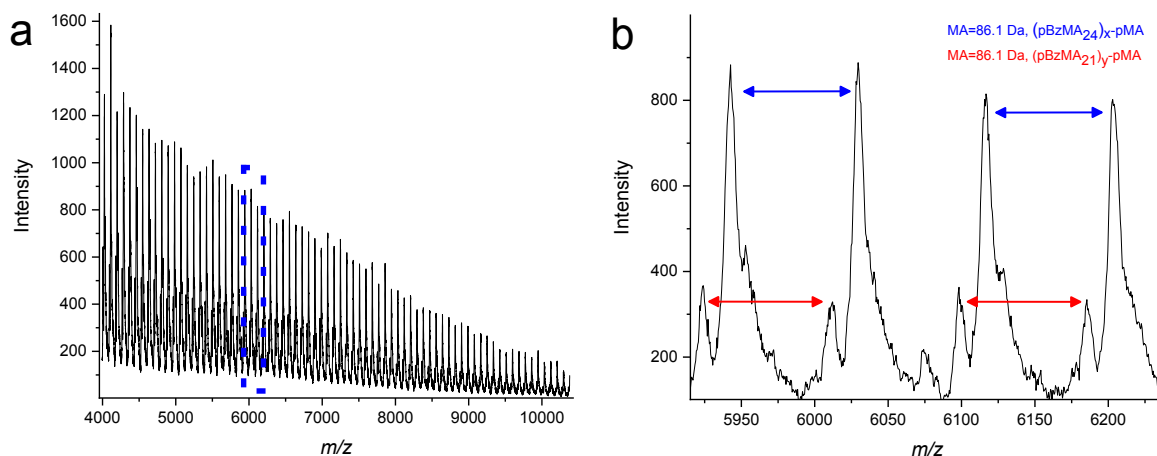

Supplementary Figure 8: a) Full MALDI-ToF spectra of the copolymerisation of MA with 0.2 mol% pBzMA macromonomer, showing the diblock copolymer formation via end-capping. b) Expansion of the MALDI-ToF (a) of the in the 5920-6230 m/z range.

Supplementary Table 5: GPC data of the free radical polymerisation of MA in the presence of pBzMA.

| Reagents                             | Macromonomer to Monomer mol% | $M_{n, GPC}$ | $\bar{D}$ |
|--------------------------------------|------------------------------|--------------|-----------|
| PBzMA <sub>24</sub>                  | -                            | 4200         | 1.72      |
| PBzMA <sub>24</sub> PMA <sub>x</sub> | 0.10                         | 25000        | 3.83      |
| PBzMA <sub>24</sub> PMA <sub>y</sub> | 0.20                         | 20200        | 3.82      |

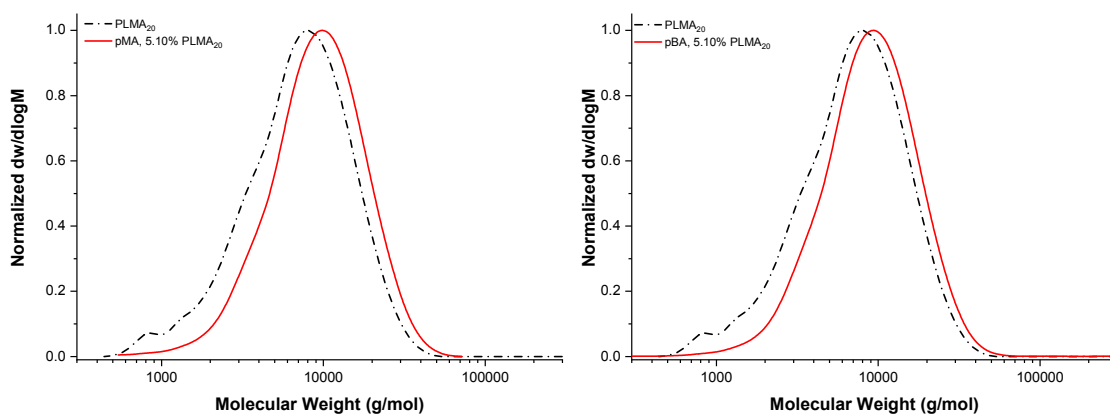

Supplementary Figure 9: GPC results of the free radical polymerisation of a) MA in the presence of 5.1 mol% pLMA and b) BA in the presence of 5.1 mol% pLMA.

Supplementary Table 6: GPC data of the free radical polymerisation of MA and BA in the presence of pLMA.

| Reagents                             | Macromonomer to Monomer<br>mol% | $M_{n, GPC}$ | $\bar{D}$ |
|--------------------------------------|---------------------------------|--------------|-----------|
| PLMA <sub>18</sub> PMA <sub>x1</sub> | 0.67                            | 10700        | 2.27      |
| PLMA <sub>18</sub> PMA <sub>x2</sub> | 1.67                            | 7600         | 2.05      |
| PLMA <sub>20</sub> PMA <sub>x3</sub> | 5.10                            | 6800         | 1.63      |
| PLMA <sub>20</sub> PBA <sub>y1</sub> | 0.18                            | 23000        | 2.54      |
| PLMA <sub>20</sub> PBA <sub>y2</sub> | 5.10                            | 6800         | 1.57      |

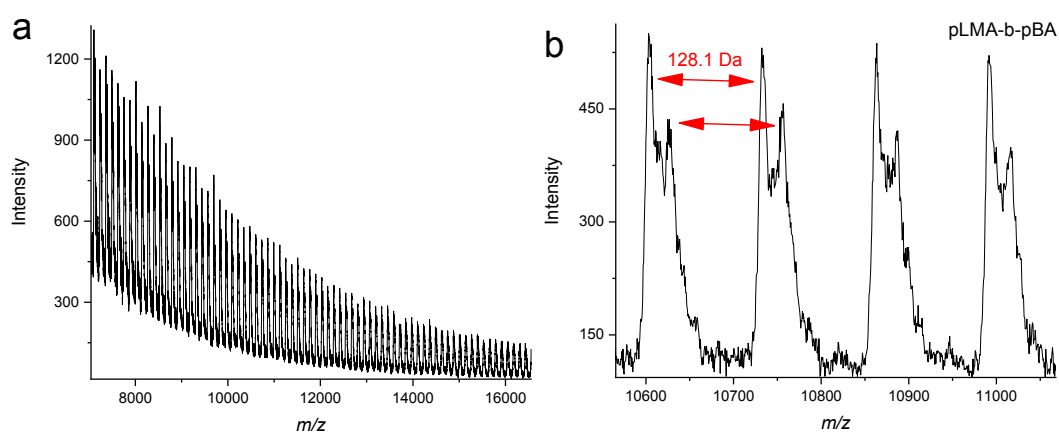

Supplementary Figure 10: a) Full MALDI-ToF spectra of the copolymerisation of BA with 0.18 mol% pLMA macromonomer, showing the diblock copolymer formation via end-capping. b) Expansion of the MALDI-ToF (a) of the in the 10550-11050 m/z range.

## Equipment

All techniques of characterization and analysis were used for the products synthesized are listed below:

- **Nuclear Magnetic Resonance ( $^1\text{H}$  NMR,  $^{13}\text{C}$  NMR, and DOSY NMR):** All spectra were recorded on Bruker DPX-300, DPX-400 and DPX-500 MHz spectrometers using deuterated chloroform ( $\text{CDCl}_3$ ) purchased from Aldrich. Chemical shifts are given in ppm downfield from the internal standard tetramethylsilane.
- **Gel Permeation Chromatography (GPC):** All chromatography measurements were conducted using an Agilent 390-LC MDS instrument equipped with a differential refractive index (DRI) and dual wavelength UV detectors. The system was equipped with 2 x PLgel Mixed C columns (300 x 7.5 mm) and a PLgel 5  $\mu\text{m}$  guard column. The eluent is THF with 2 % TEA (triethylamine) and 0.01 % BHT (butylated hydroxytoluene) additives. Samples were run at 1mL/min at 30°C. Poly(methyl methacrylate) and polystyrene standards (Agilent EasyVials) were used for calibration. Analyte samples were filtered through a GVHP membrane with 0.22  $\mu\text{m}$  pore size before injection. Respectively, experimental molar mass ( $M_{\text{SEC}}$ ) and dispersity ( $\bar{D}$ ) values of synthesized polymers were determined by conventional calibration using Agilent GPC/SEC software.
- **Matrix-assisted laser desorption/ionization-time of flight mass spectrometry (MALDI-TOF MS):** Matrix-assisted laser desorption ionization mass spectrometry was conducted by the use of a Bruker Daltonics Ultra flex II MALDI-ToF-MS mass spectrometer, equipped with a nitrogen laser delivering 2 ns laser pulses at 337 nm with positive ion ToF detection performed using an accelerating voltage of 25 kV. Solutions were prepared as follows: *trans*-2-[3-(4-*tert*-Butylphenyl)-2-methyl-2-propenylidene] malononitrile (DCTB) as matrix (20 mg/mL), sodium iodide as cationization agent (6 mg/mL) in tetrahydrofuran (20  $\mu\text{L}$ ) and sample (10 mg/mL) were mixed, and 0.5  $\mu\text{L}$  of the mixture was applied on the target plate. Spectra recording was made in linear mode calibrating PEG-Me 1900-10000 Da.
- **Gas Chromatography-Flame Ionisation Detection (GC-FID):** Gas chromatography-flame ionisation detection (GC-FID) was performed on a Shimadzu GC-2014 equipped with a Shimadzu AO20i autosampler. The carrier gas is hydrogen, supplied by an external hydrogen generator. The GC is fitted with a polar Stabilwax-DA column (30 m length, 0.32 mm ID and 0.25  $\mu\text{m}$  film thickness). The injection volume is 1  $\mu\text{L}$  with a 39 split ratio. The injection temperature is 250°C



and the flame temperature is 300°C. The heating profile is 60-200°C at a rate of 10°C/minute and then 200-240°C at 15°C/minute and held for 3 minutes.
